# Supplementary material for: CRISPR-based gene editing enables FOXP3 gene repair in IPEX patient cells
Source: PubMed Central journal article supplement — Sci Adv. 2020 May 6;6(19):eaaz0571. doi: 10.1126/sciadv.aaz0571 (PMC7202871; doi:10.1126/sciadv.aaz0571), 2020-05-06
Supplement: aaz0571_SM.pdf [file aaz0571_SM.pdf]

[advances.sciencemag.org/cgi/content/full/6/19/eaaz0571/DC1](https://advances.sciencemag.org/cgi/content/full/6/19/eaaz0571/DC1)

## Supplementary Materials for

### **CRISPR-based gene editing enables *FOXP3* gene repair in IPEX patient cells**

M. Goodwin, E. Lee, U. Lakshmanan, S. Shipp, L. Froessler, F. Barzaghi, L. Passerini, M. Narula, A. Sheikali, C. M. Lee, G. Bao, C. S. Bauer, H. K. Miller, M. Garcia-Lloret, M. J. Butte, A. Bertaina, A. Shah, M. Pavel-Dinu, A. Hendel, M. Porteus, M. G. Roncarolo, R. Bacchetta\*

\*Corresponding author. Email: [rosab@stanford.edu](mailto:rosab@stanford.edu)

Published 6 May 2020, *Sci. Adv.* **6**, eaaz0571 (2020)

DOI: [10.1126/sciadv.aaz0571](https://doi.org/10.1126/sciadv.aaz0571)

#### **The PDF file includes:**

Figs. S1 to S7  
Tables S1 to S4

#### **Other Supplementary Material for this manuscript includes the following:**

(available at [advances.sciencemag.org/cgi/content/full/6/19/eaaz0571/DC1](https://advances.sciencemag.org/cgi/content/full/6/19/eaaz0571/DC1))

Table S3

## Supplementary Figures

**Figure S1. The CRISPR system allows for precise *FOXP3* gene modification.** (Corresponding to Figure 1) (A) Schematic representation of the edited *FOXP3* allele after HDR-mediated insertion of a cDNA encoding the alternatively spliced isoform of *FOXP3* lacking exon 2 (dE2, *FOXP3*<sup>dE2</sup>, top construct). Construct includes the inserted *tNGFR* marker gene under the constitutive promoter, *PGK*, allowing marking of all edited cells. The *FOXP3* knockout allele (KO, *FOXP3*<sup>KO</sup>, bottom construct) created by insertion of the *tNGFR* marker gene without a *FOXP3* cDNA. The *tNGFR* marker cassette flanked by polyadenylation signals (pA) to terminate mRNA processing and block expression of the downstream *FOXP3* gene elements, creating *FOXP3* knockout while marking edited cells. (B) The sequence of CRISPR sgRNA binding sites in exon 1 of the *FOXP3* gene relative to the start codon (red). The cut site of each sgRNA is underlined. The sgRNAs were tested either individually (sg1, sg2, sg3, and sg4) or as pairs (sg5&6 and sg7&8).

**Figure S2. The *FOXP3* gene is precisely edited using CRISPR-mediated homology directed repair.** (Corresponding to Figure 2) (A) Precise targeting of the *FOXP3* gene shown by an alternative in-out PCR strategy with forward primer (FP) in *tNGFR* and the reverse primer (RP) in the endogenous *FOXP3* gene outside of the 3' arm of homology. Band representing successful recombination observed from *FOXP3*<sup>FL</sup> and *FOXP3*<sup>KO</sup> gene edited HSPCs, both of which contain the *tNGFR* cassettes (adjacent lanes represent biological replicates). Control band targeting non-modified *FOXP3* region. (B) *FOXP3* editing rates by *tNGFR* in cord blood-derived HSPCs edited with *FOXP3*<sup>dE2</sup> or *FOXP3*<sup>KO</sup> constructs (mean ± SD). (C) Comparison of editing frequency by two methods of detection: FACS for *tNGFR* and quantitative in-out PCR using Digital Drop PCR (ddPCR) (three *FOXP3*<sup>FLcoW</sup> edited HSPC cell donors each tested in parallel by both methods). (D) Time course of *tNGFR* expression by flow cytometry on days post-editing, showing an initial *tNGFR* intermediate population that is resolved over time. (E) Off-target sites predicted bioinformatically using the COSMID tool. Pie chart of the gene region of the predicted off-target sites, showing the majority of sites (96%) in non-coding regions of the genome. (F) Ten off-target sites from GUIDE-seq oligo capture assay in U2OS cells with the closest gene name and number of sequencing reads per site. The *FOXP3* sgRNA (plus PAM) sequence shown above and mismatches with off-target sites are highlighted. The number of reads in the *FOXP3* on-target site shown for comparison.

**Figure S3. Tregs and Teff cell populations are effectively separated prior to CRISPR-based editing.** (Corresponding to Figure 3) (A) Purity of the fractionated Treg and Teff cell samples from peripheral blood shown by flow cytometry after anti-CD25 magnetic bead separation using two serial columns (CD25++). Representative flow cytometry plots showing the total population of CD4+ T cells prior to separation (left panel); Teff cell CD25- fraction (middle panel); and CD25++ Treg-enriched fraction (right panel) stained for Tregs in two parallel gating strategies. (B) Frequency of TSDR demethylated Tregs by epigenetic bisulfite qPCR. Shown are CD25- fraction after anti-CD25 magnetic bead separation enriched for Teff cells, CD25++ fraction enriched for Tregs, and MT-2 Treg cell line for comparison.

**Figure S4. The *FOXP3* gene is knocked-in and knocked out using CRISPR-based homologous recombination.** (Corresponding to Figure 3) (A) Example flow cytometry plot showing that MT-2 Tregs edited with the FL construct co-express *FOXP3* and *tNGFR*. Overlay contains negative control sample that is 98% double negative for *FOXP3* and *tNGFR* (*FOXP3*- *tNGFR*-), WT mock treated cells that are 98% *FOXP3*+ *tNGFR*-, and FL cDNA edited cells that are 93% double positive (*FOXP3*+*tNGFR*+). (B) Knockout of the *FOXP3* gene in the MT-2 Treg cell line by insertion of the *tNGFR* cassette without *FOXP3* cDNA into the *FOXP3* locus (*FOXP3*<sup>KO</sup>). Shown is *FOXP3* protein expression by flow cytometry with median fluorescent intensity (MFI), comparing the wild-type MT-2 cells with two replicates of the *FOXP3*<sup>KO</sup> treated cells.

**Figure S5. Tregs edited with different constructs display comparable amounts of *FOXP3* function and *in vitro* suppressive capacity.** (Corresponding to Figure 3) (A) *FOXP3* protein expression by flow cytometry in *FOXP3*<sup>dE2</sup> edited Tregs compared with wild-type mock treated Tregs (mean ± SD, n=2, p < 0.05). Data represented as the ratio of *FOXP3* median fluorescent intensity (MFI) relative to WT unmodified Tregs, showing roughly half expression (similar to full length cDNA expression). (B) Suppression assay comparing Tregs edited with cDNAs of the two *FOXP3* isoforms, *FOXP3*<sup>FLcoW</sup> and *FOXP3*<sup>dE2</sup>. The percent calculated suppression shown to the left. Graph to the right showing quantified suppressive capacity of three matched Tregs samples edited in parallel with the two constructs, showing that both isoforms support a similar level of

suppressive function in Tregs. (C) Suppression assay testing the function of Tregs from two healthy donors (HD) edited with *FOXP3*<sup>FL</sup> and *FOXP3*<sup>FLcoW</sup>. The calculated percent suppression of CFSE-labeled stimulated responders (R\*) is shown to the left. As a negative control, cultured Teff cells from a parallel *FOXP3* editing experiment were used in place of Tregs and were shown to not be suppressive (N/A). (D) Suppression assay demonstrating that *FOXP3*<sup>FLcoW</sup> edited Teff cells lack suppressive function as anticipated. The proliferation rate of stimulated responders (R\*) is similar to that of responders co-cultured with WT mock treated or *FOXP3*<sup>FLcoW</sup> edited Teff cells.

**Figure S6. *FOXP3* gene editing preserves Teff cell proliferative function.** (Corresponding to Figure 4) Time course of proliferation of Teff cells after activation with anti-CD3/28 beads (1:100 bead:cell ratio), showing progressive proliferation on subsequent days 2, 3, and 4 post-activation. Non-activated cells included for comparison and show some residual proliferation due to pre-editing activation and culturing. The wild-type Teff cells are compared to *FOXP3*<sup>FLcoW</sup> edited Teff with no statistically significant differences observed (mean  $\pm$  SD, n=3, p = ns).

**Figure S7. *FOXP3* edited HSPCs retain multi-lineage engraftment and differentiation potential.** (Corresponding to Figure 6) (A) Phenotypic analysis of edited and control HSPCs pre-injection by flow cytometry, evaluating editing rates (tNGFR+), CD34+ purity, and different HSPC subsets including lymphoid-primed multipotent progenitors (LMPP, CD34+CD38-CD45RA+CD90-/v), multipotent progenitors (MPP, CD34+CD38-CD45RA-CD90-), and HSCs (CD34+CD38-CD45RA-CD90+). (B) Survival curve of mice engrafted with HSPCs from 3 experimental conditions over time. (C) Persistence of edited tNGFR+ cells engrafted in the hu-mouse at wk 14 demonstrated by flow cytometry. (D) Quantification of tNGFR+ rates in hu-mouse bone marrow at wk 14 showing different cord blood HSPC donors. (E) Genomic analysis showing percentage of cells with unmodified wild-type *FOXP3* alleles (blue), alleles edited by NHEJ and containing indel mutations (gray, TIDE analysis), and alleles edited by HDR (red, ddPCR in-out PCR). Shown is the genotype of HSPCs pre-injection (left) and in hu-mouse bone marrow at wk 14, demonstrating that *FOXP3* edited cells do not expand abnormally *in vivo*. (F) Functional testing of *in vivo*-differentiated CD4+ CD25- Teff cells sorted from the hu-mouse spleen. CFSE-stained Teff cells were stimulated with 1:100 and 1:25 b:c ratio using anti-CD3/28 beads and the proliferation rate was monitored by flow cytometry at day 4 post-stimulation. *FOXP3* edited Teff cells were sorted into tNGFR+ and tNGFR- fractions. Human peripheral blood-derived Teff cells were included for reference. (G) Suppression assay on CD4+CD25+ Tregs sorted from hu-mouse spleen. Flow cytometry plots of CFSE-stained responders stimulated with 1:25 b:c ratio. *FOXP3* edited Tregs were sorted into tNGFR+ and tNGFR- fractions and co-cultured with responders.

Figure S1. The CRISPR system allows for precise *FOXP3* gene modification.

A

Alternative experimental constructs

Knock-in of alternatively spliced cDNA lacking exon 2 ( *FOXP3*<sup>dE2</sup> )

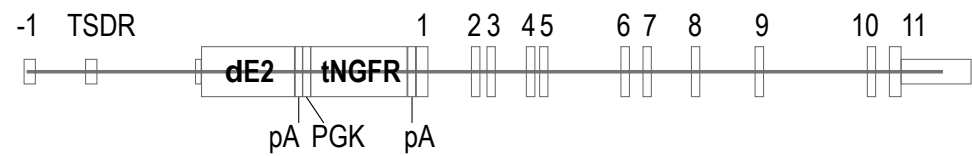

Knockout of *FOXP3* by disruption with tNGFR maker gene ( *FOXP3*<sup>KO</sup> )

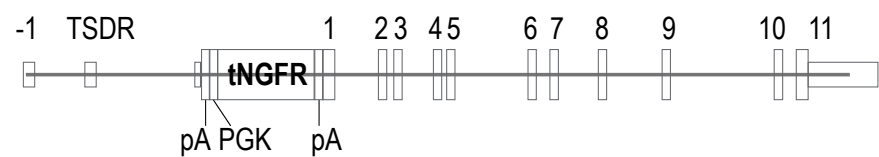

B

CRISPR sgRNA Screen Target Sites in Exon 1

CCTGCCCTTGGACAAGGACCG **ATG**CCCCAACCCAGGCCTGGCAAGCCCTCGGCCCTTCCTTGGCCCTTGGCCCATCCCCAGGAGCCTCGCCAGCTGGA

E1\_1 TTGGACAAGGACCGATGCC

E1\_2 AGGACCGATGCCAA CCCC

E1\_3 AGGAGCCTCGCCAGCTGGA

E1\_4 GGCAAGCCCTCGGCCCTTC

E1\_5\_6 GGCAAGCCCTCGGCCCTTC TTGGCCCTTGGCCCAT CCCC

E1\_7\_8 GGCTGGCAAGCCCTCGGCC CCCCAGGAGCCTCGCC CAGC

**A** **FOXP3 Gene In-out PCR**

CD34<sup>+</sup> HSPCs

ladder edited FL edited FL edited KO edited KO WT mock

1650  
1000  
850

← control  
← edited

FP in RP out

tNGFR

**B** **FOXP3 Editing Rates (HDR of dE2 and KO)**

% tNGFR<sup>+</sup>

FOXP3<sup>dE2</sup> edited FOXP3<sup>KO</sup> edited

**C** **Gene Editing Rates by FACS vs ddPCR**

% Editing

FACS ddPCR

**D** **Time Course of tNGFR Marker Expression after Editing**

day 3 post-editing day 4 day 6 day 10

SSC-A

tNGFR

23% 27% 23% 24%

**E** **Off-target *in silico* prediction COSMID - gene region**

intron  
intergenic  
3'UTR  
exon  
non-coding  
promoter  
TSS

**F** **GUIDE-seq predicted off-targets in U2OS cells**

sgRNA 1 10 20 23

Closest Gene

| sgRNA                  | Closest Gene | Reads |
|------------------------|--------------|-------|
| AGGACCCGATGCCCCAACCCCN | FOXP3        | 2155  |
|                        | ZNF311       | 762   |
|                        | LINC02070    | 132   |
|                        | IPO8         | 83    |
|                        | LOC101927131 | 57    |
|                        | SLC7A4       | 54    |
|                        | ARPIN        | 48    |
|                        | MAP3K14-AS1  | 27    |
|                        | EXOC3L2      | 20    |
|                        | KIF1A        | 8     |
|                        | SORBS3       | 3     |

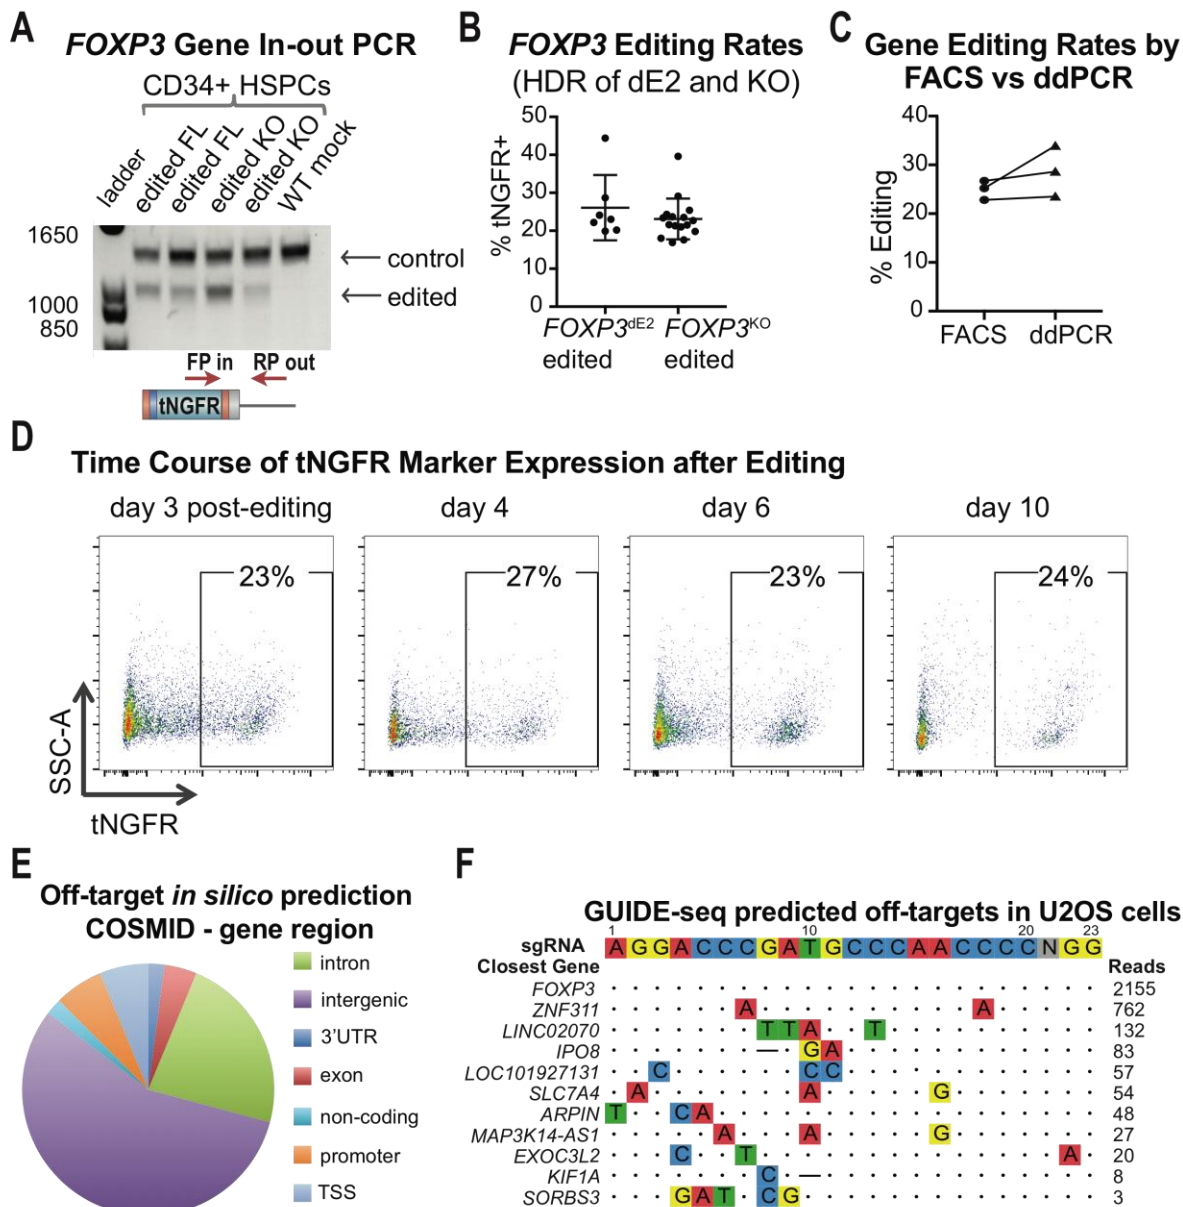

**Figure S3. Tregs and Teff cell populations are effectively separated prior to CRISPR-based editing.**

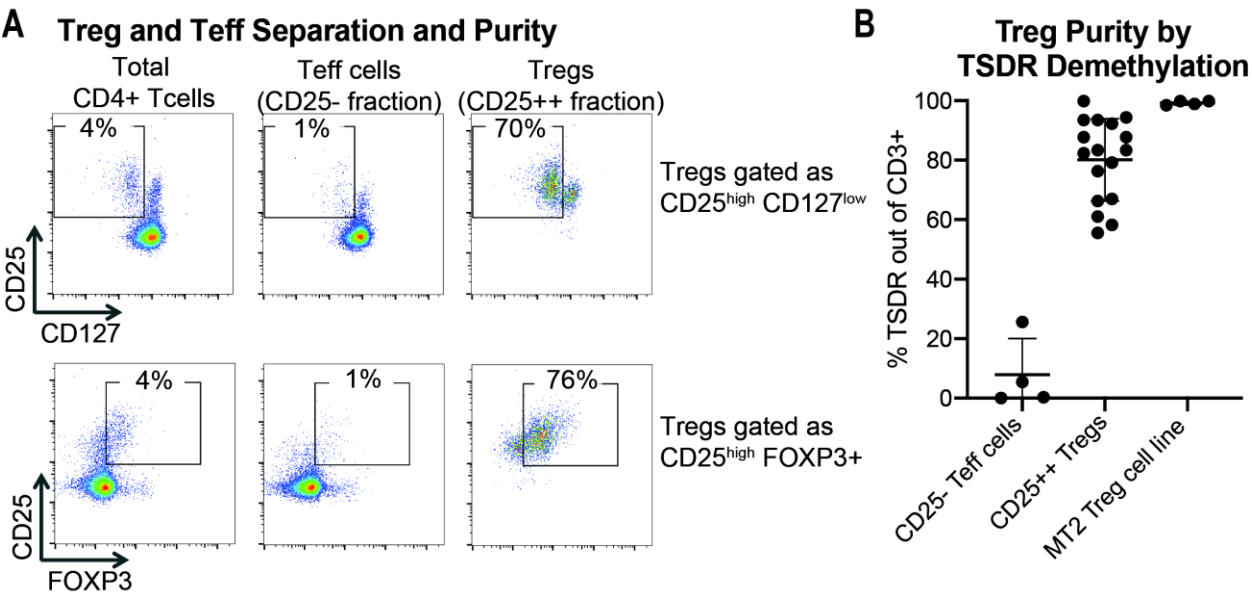

Figure S4. The *FOXP3* gene is knocked-in and knocked out using CRISPR-based homologous recombination.

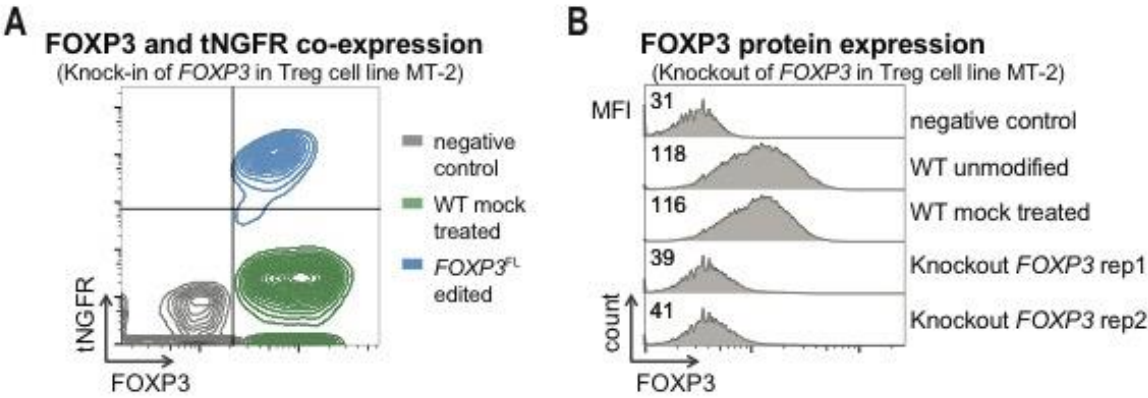

**Figure S5. Tregs edited with different cDNA constructs display comparable amounts of FOXP3 function and *in vitro* suppressive capacity.**

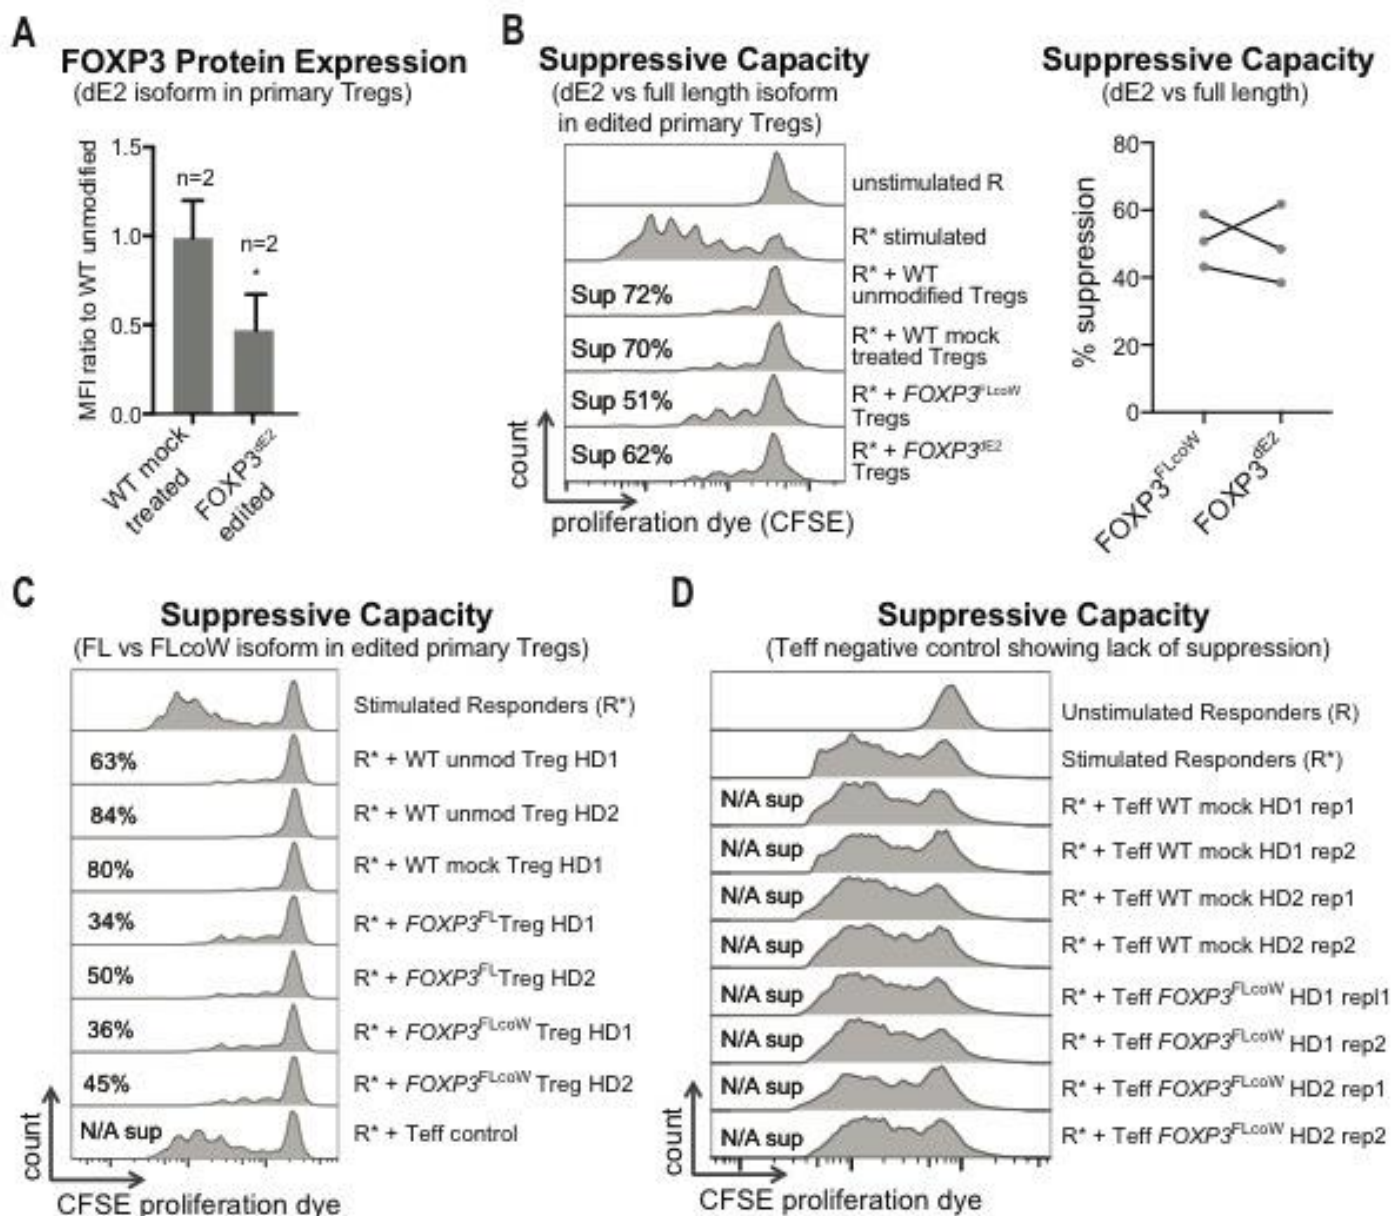

**Figure S6. *FOXP3* gene editing preserves Teff cell proliferative function.**

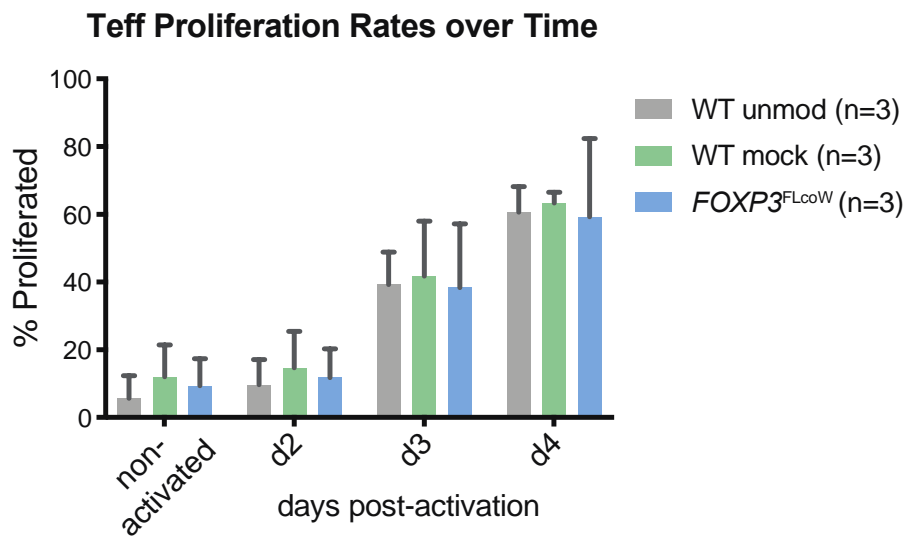

**Figure S7. *FOXP3* edited HSPCs retain multi-lineage engraftment and differentiation potential.**

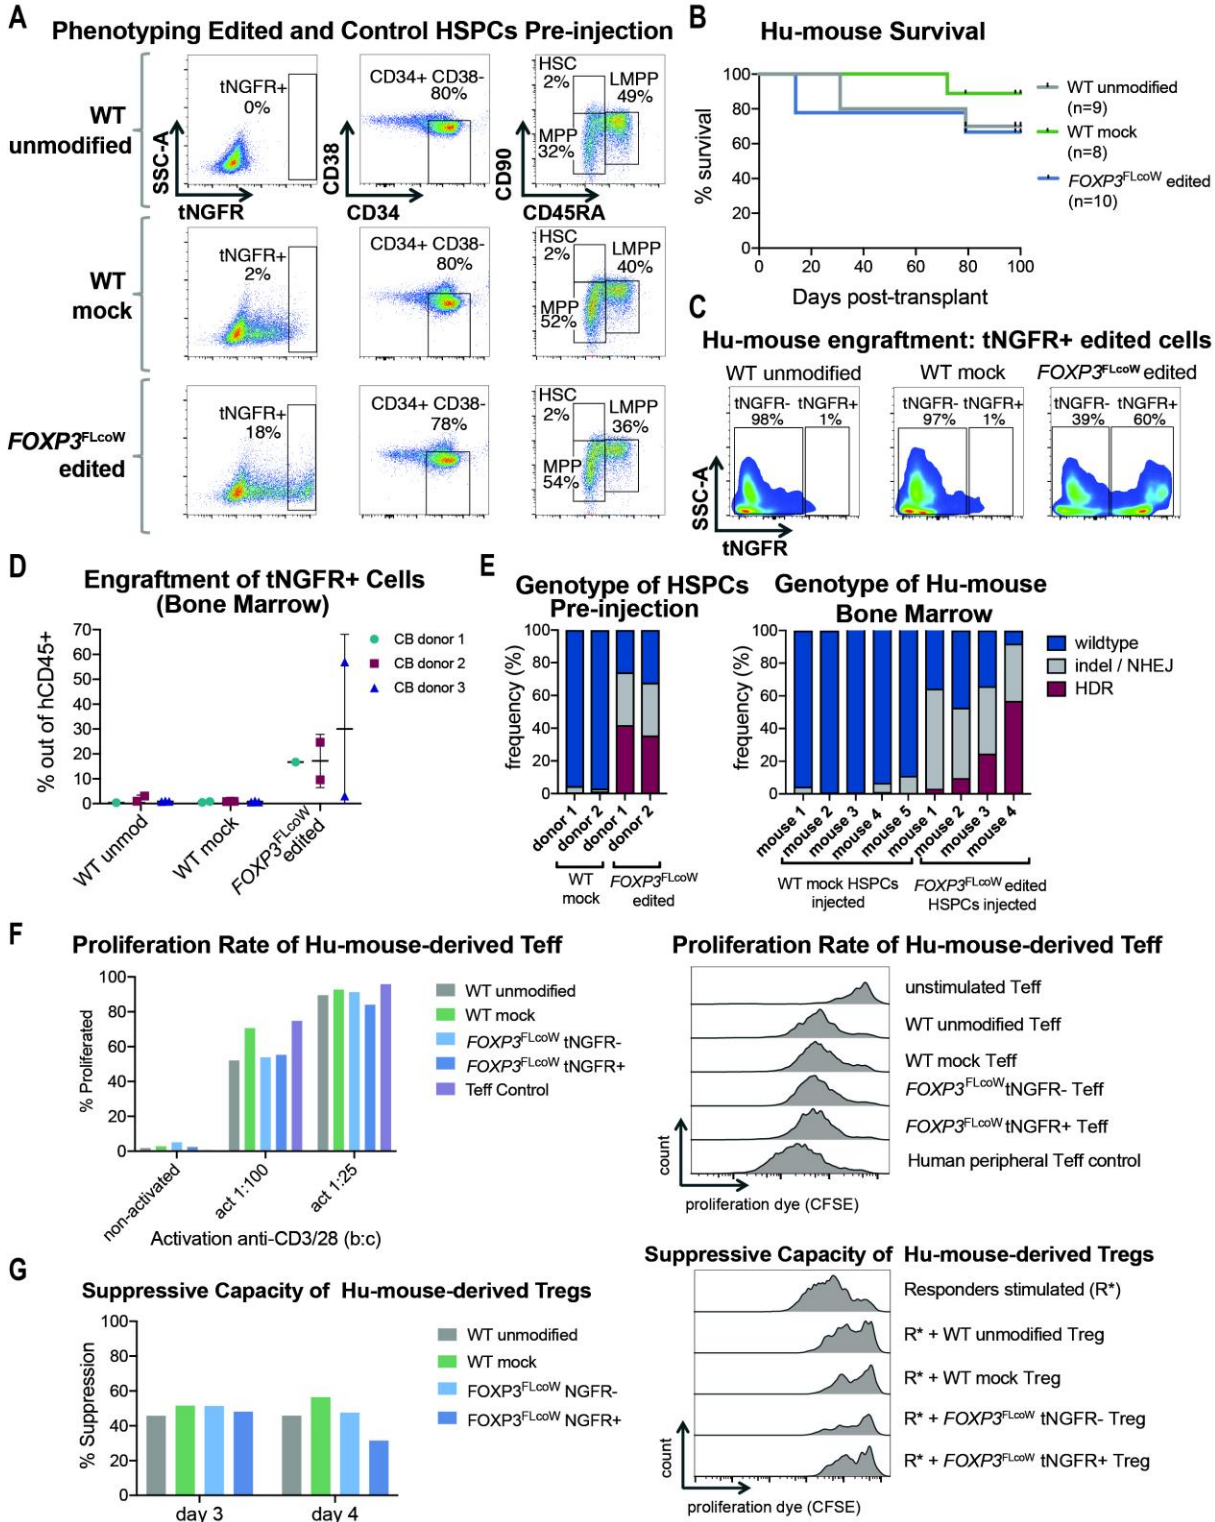

**Supplementary Materials:**

**Table S1. *FOXP3* sgRNAs, primers, and probes.**

| Assay                                                                             | Name                                                                                                                                                                                                                                                                                 | Sequence                                                                                                                                                                                                                                                                                                                                                                                                                                                                                       |
|-----------------------------------------------------------------------------------|--------------------------------------------------------------------------------------------------------------------------------------------------------------------------------------------------------------------------------------------------------------------------------------|------------------------------------------------------------------------------------------------------------------------------------------------------------------------------------------------------------------------------------------------------------------------------------------------------------------------------------------------------------------------------------------------------------------------------------------------------------------------------------------------|
| <i>FOXP3</i> sgRNAs used for screening                                            | sgRNA_FOXP3_E1_1                                                                                                                                                                                                                                                                     | 5'-GGCATCGGGTCCTTGTCCAA-3'                                                                                                                                                                                                                                                                                                                                                                                                                                                                     |
|                                                                                   | sgRNA_FOXP3_E1_2                                                                                                                                                                                                                                                                     | 5'-AGGACCCGATGCCCAACCCC-3'                                                                                                                                                                                                                                                                                                                                                                                                                                                                     |
|                                                                                   | sgRNA_FOXP3_E1_3                                                                                                                                                                                                                                                                     | 5'-TCCAGCTGGGCGAGGCTCCT-3'                                                                                                                                                                                                                                                                                                                                                                                                                                                                     |
|                                                                                   | sgRNA_FOXP3_E1_4                                                                                                                                                                                                                                                                     | 5'-GAAGGGGCGGAGGGCTTGCC-3'                                                                                                                                                                                                                                                                                                                                                                                                                                                                     |
|                                                                                   | sgRNA_FOXP3_E1_5                                                                                                                                                                                                                                                                     | 5'-GAAGGGGCGGAGGGCTTGCC-3'                                                                                                                                                                                                                                                                                                                                                                                                                                                                     |
|                                                                                   | sgRNA_FOXP3_E1_6                                                                                                                                                                                                                                                                     | 5'-TTGGCCCTTGGCCCATCCCC-3'                                                                                                                                                                                                                                                                                                                                                                                                                                                                     |
|                                                                                   | sgRNA_FOXP3_E1_7                                                                                                                                                                                                                                                                     | 5'-GGCCGAGGGCTTGCCAGGCC-3'                                                                                                                                                                                                                                                                                                                                                                                                                                                                     |
|                                                                                   | sgRNA_FOXP3_E1_8                                                                                                                                                                                                                                                                     | 5'-CCCCAGGAGCCTCGCCCAGC-3'                                                                                                                                                                                                                                                                                                                                                                                                                                                                     |
| Chemically modified sgRNA used for <i>FOXP3</i> editing                           | sgRNA_FOXP3_E1_2                                                                                                                                                                                                                                                                     | 5'- 2'OMe(A(ps)G(ps)G(ps))ACC CGA UGC CCA ACC CCG UUU UAG AGC UAG AAA UAG CAA GUU AAA AUA AGG CUA GUC CGU UAU CAA CUU GAA AAA GUG GCA CCG AGU CGG UGC UUU 2'OMe(U(ps)U(ps)U)-3' (ps indicates phosphorothioate, 2'OMe indicates 2'-O-methyl)                                                                                                                                                                                                                                                   |
| TIDE analysis primers for <i>FOXP3</i> indel rates                                | FP E1 TIDE <i>FOXP3</i><br>RP E1 TIDE <i>FOXP3</i>                                                                                                                                                                                                                                   | 5'-CTAGAGCTGGGGTGCAACTATGG-3'<br>5'-GACTACAATACGGCCTCCTCCTCTC-3'                                                                                                                                                                                                                                                                                                                                                                                                                               |
| <i>FOXP3</i> in-out PCR primers for qualitative analysis of HDR                   | FOXP3_out5arm_FP<br>FOXP3_cDNA_RP<br>FOXP3_NGFR_FP<br>FOXP3_out3arm_RP<br>FOXP3_in3arm_control_FP<br>FOXP3_out3arm_control_RP                                                                                                                                                        | 5'-ATGTCAGCTCGGTCCTTCCA-3'<br>5'-TGGCATAGGATTAAGGGAAGT-3'<br>5'-AGCCTTCAAGAGGTGGAACA-3'<br>5'-AGGCCATCCTGATCCTCAC-3'<br>5'-TGCCTCCTCTTCTTCTCCTTGA-3'<br>5'-GAGCCTCGAAAACCCTGACT-3'                                                                                                                                                                                                                                                                                                             |
| <i>FOXP3</i> in-out PCR primers and probes for quantitative ddPCR analysis of HDR | FOXP3_inNGFR_ddPCR_FP<br>FOXP3_inside_probe_FAM<br>FOXP3_out3arm_ddPCR_RP<br>FOXP3_control_ddPCR_FP<br>FOXP3_control_probe_HEX<br>FOXP3_control_ddPCR_RP                                                                                                                             | 5'-GGGAGGATTGGGAAGACAAT-3'<br>5'-TCAGAGATTGGAGGCTCTCC-3'<br>5'-ACAATACGGCCTCCTCCTCT-3'<br>5'-CACCGAAATCGGTATTAGTTTG-3'<br>5'-CAGTTCTGGAGGCCAGAGTC-3'<br>5'-CCCGGGGGGAGTATAGAAGG-3'                                                                                                                                                                                                                                                                                                             |
| Sequencing of <i>FOXP3</i> locus and mRNA expressed from edited allele            | FOXP3_E-1_FP2<br>FOXP3_E5_RP2<br>FOXP3_E5_RP2d<br>FOXP3_E1_FP1d<br>FOXP3_E3_RP1d<br>FOXP3_E2_FP3d<br>FOXP3_E5_FP4d<br>FOXP3_E10_RP4d<br>FOXP3_E11_RP1d<br>FOXP3_E11_RP2d<br>FOXP3_E11_FP1d<br>FOXP3_NGFR_RP1<br>FOXP3_E11_FP2d<br>FOXP3_NGFR_RP2<br>FOXP3_E10_FP1d<br>FOXP3_NGFR_RP3 | 5'-CCAGGCTGATCCTTTTCTGTCA-3'<br>5'-CAGACACCATTGCGCAGCAG-3'<br>5'-CAGACGCCATTGGCCAGAAGG-3'<br>5'-TGCACCCAAGGCTTCTGAC-3'<br>5'-CTGGAGAACTGGGGTCC-3'<br>5'-CGCCCTCATTTTCATGCACCA-3'<br>5'-TTGAAGAGCCAGAAGATTTC-3'<br>5'-ATGCGAACATTCTTGTGAAC-3'<br>5'-AGCACTTGTGCAGGGAAAGA-3'<br>5'-CCCGGGCGTGGGATTGCTGCA-3'<br>5'-AACGGTCACAAAGACCAAGC-3'<br>5'-CACCGCTGTGTGTGTACAGG-3'<br>5'-AACGCTATTTCGGCACAATCT-3'<br>5'-CCAGTCGTCTCATCCTGGTAG-3'<br>5'-AGGCACCTGAGAAGCAAAGA-3'<br>5'-GCTCACACACGGTCTGGTT-3' |

|                |                             |
|----------------|-----------------------------|
| FOXP3_E10_FP2d | 5'-AGGCACCTGAGAAGCAAAGA-3'  |
| FOXP3_E1_RP1   | 5'-GGGGTTCAAGGAAGAAGAGG-3'  |
| FOXP3_E11_FP3d | 5'-AACGGTCACAAAGACCAAGC-3'  |
| FOXP3_E2_RP1   | 5'-CCTGGAGGAGTGCCTGTAAG-3'  |
| FOXP3_E11_FP4d | 5'-ACGCTATTTCGGCACAATCTT-3' |
| FOXP3_E2/3_RP1 | 5'-TTGAGAGCTGGTGCATGAAA-3'  |
| FOXP3_E-1_FP3  | 5'-ACCGTACAGCGTGGTTTTTC-3'  |
| FOXP3_E7_RP1d  | 5'-TTGGTGAGAGCCATTTTTCC-3'  |
| FOXP3_E-1_FP4  | 5'-AGAGAGAGGTCTGCGGCTTC-3'  |
| FOXP3_E9_RP1d  | 5'-GAGGCCTCATGTTGTGGAAT-3'  |
| FOXP3_E7_FP1d  | 5'-GGAAAAATGGCTCTCACCAA-3'  |
| FOXP3_E6_RP1d  | 5'-CCAACAAGTGGTCTGCTTGA-3'  |
| FOXP3_E-1_RP1  | 5'-AGGCTTGGTGAAGTGGACTG-3'  |
| FOXP3 E1_RP2d  | 5'-GGCTAGGTGCGCTAGGTTTT-3'  |

**Table S2. Off-target site analysis of FOXP3 CRISPR system.** See extended off-target analysis (including other sgRNAs screened) in attached supplementary data file.

| Method                             | OT      | Predicted OT? | Sequence                     | Gene region | Genome location (hg19)   | Nearest gene | Notes                            |
|------------------------------------|---------|---------------|------------------------------|-------------|--------------------------|--------------|----------------------------------|
| NGS validation in BM               | OT1_NGS | OT1_B         | TGGCACCGATGC<br>CCAACCCCTGG  | Intron 3    | chr15:90449230-90449252  | ARPIN        | 0.6% / 1.6% CB/BM                |
|                                    | OT2_NGS | OT3_B         | AGGACCAGATGC<br>CCAACACCTGG  | intergenic  | chr6:28980904-28980926   | ZNF311       | 0.4% / 0.8% CB/BM                |
|                                    | OT3_NGS | OT4_B         | CTGTCCCCATGC<br>CCAACCCAGG   | intron 2    | chr6:29638299-29638321   | MOG          | 0.1% / 0.2% CB/BM                |
|                                    | OT4_NGS | OT14_B        | AGGACACGAAGC<br>CCAGCCCCGGG  | In-RNA      | chr17:43325321-43325343  | MAP3K14-AS1  | 0.1% / 0.2% CB/BM                |
| GUIDE-Seq in U2OS cells            | OT1_GS  | OT3_B         | AGGACCAGATGC<br>CCAACACCTGG  | Intergenic  | chr6:28980904-28980926   | ZNF311       | 762 seq reads (vs 2155 in FOXP3) |
|                                    | OT2_GS  | Not predicted | AGGACCCCTTAGC<br>TCAACCCAGG  | Intergenic  | chr3:86673099-86673121   | LINC02070    | 132 seq reads                    |
|                                    | OT3_GS  | Not predicted | AGGACCCAGACC<br>CAACCCCTGG   | Intergenic  | chr12:30542757-30542778  | IPO8         | 83 seq reads                     |
|                                    | OT4_GS  | OT8_B         | AGCACCCGACCC<br>CCAACCCAGG   | Intergenic  | chr16:11581470-11581492  | LOC101927131 | 57 seq reads                     |
|                                    | OT5_GS  | OT13_B        | AAGACCCGAAGC<br>CCAGCCCCCTGG | Exon        | chr22:21383175-21383197  | SLC7A4       | 54 seq reads                     |
|                                    | OT6_GS  | OT1_B         | TGGCACCGATGC<br>CCAACCCCTGG  | Intron      | chr15:90449230-90449252  | ARPIN        | 48 seq reads                     |
|                                    | OT7_GS  | OT14_B        | AGGACACGAAGC<br>CCAGCCCCGGG  | Exon        | chr17:43325321-43325343  | MAP3K14-AS1  | 27 seq reads                     |
|                                    | OT8_GS  | OT36_B        | AGGCCCTGATGC<br>CCAACCCCCAG  | Intron      | chr19:45731177-45731199  | EXOC3L2      | 20 seq reads                     |
|                                    | OT9_GS  | OT32_B        | AGGACCCCAGCC<br>CAACCCCTGG   | Intron      | chr2:241677688-241677709 | KIF1A        | 8 seq reads                      |
|                                    | OT10_GS | Not predicted | AGGGATCCGTGC<br>CCAACCCAGG   | Intron      | chr8:22409581-22409603   | SORBS3       | 3 seq reads                      |
| Bioinformatic prediction by COSMID | OT1_B   | OT1_B         | TGGCACCGATGC<br>CCAACCCCTGG  | intron      | chr15:90449230-90449252  | ARPIN        | score: 0.36                      |
|                                    | OT2_B   | OT2_B         | TGCACCTGATGC<br>CCAACCCAGG   | intron      | chr9:36896036-36896058   | MIR4476      | score: 0.38                      |
|                                    | OT3_B   | OT3_B         | AGGACCAGATGC<br>CCAACACCTGG  | Intergenic  | chr6:28980904-28980926   | ZNF311       | score: 4.23                      |
|                                    | OT4_B   | OT4_B         | CTGTCCCCATGC<br>CCAACCCAGG   | intron      | chr6:29638299-29638321   | MOG          | score: 0.57                      |
|                                    | OT5_B   | OT5_B         | AGGCCCTGAAGC<br>CCAACCCGGG   | intron      | chr11:8796275-8796297    | LOC102724784 | score: 0.9                       |
|                                    | OT6_B   | OT6_B         | TGAACCCAATCC<br>CCAACCCGGG   | Intergenic  | chr21:43451894-43451916  | ZNF295       | score: 1.12                      |
|                                    | OT7_B   | OT7_B         | CGCACCCAATCC<br>CCAACCCAGG   | intron      | chr16:55807075-55807097  | CES1P1       | score: 1.12                      |
|                                    | OT8_B   | OT8_B         | AGCACCCGACCC<br>CCAACCCAGG   | Intergenic  | chr16:11581470-11581492  | LOC101927131 | score: 1.35                      |
|                                    | OT9_B   | OT9_B         | AGGACCTGAGGC<br>CAAACCCAGG   | Intergenic  | chr4:153104124-153104146 | LOC100996286 | score: 2.03                      |

|        |        |                                 |               |                               |              |             |
|--------|--------|---------------------------------|---------------|-------------------------------|--------------|-------------|
| OT10_B | OT10_B | TGGACCACATGC<br>CCCACCCCTGG     | intron        | chr1:234767750-<br>234767772  | LINC00184    | score: 2.4  |
| OT11_B | OT11_B | GGGACTCGAAGC<br>CCCACCCCTGG     | intron        | chr19:17955771-<br>17955793   | JAK3         | score: 2.61 |
| OT12_B | OT12_B | TGCACCCCATGC<br>CCAGCCCCAGG     | intron        | chr11:44917438-<br>44917460   | TP53I11      | score: 2.72 |
| OT13_B | OT13_B | AAGACCCGAAGC<br>CCAGCCCCCTGG    | TTS           | chr22:21383175-<br>21383197   | SLC7A4       | score: 2.93 |
| OT14_B | OT14_B | AGGACACGAAGC<br>CCAGCCCCGGG     | promoter      | chr17:43325321-<br>43325343   | MAP3K14      | score: 3.01 |
| OT15_B | OT15_B | AGGACCTGAGGC<br>CCAGCCCCAGG     | TTS           | chr14:10061074<br>4-100610766 | DEGS2        | score: 3.03 |
| OT16_B | OT16_B | TGGACCCCAAGC<br>CCAGCCCCAGG     | promoter      | chr6:31746006-<br>31746028    | VWA7         | score: 3.07 |
| OT17_B | OT17_B | GGGCCCCGATCC<br>CCAGCCCCCTGG    | intron        | chr6:167070257-<br>167070279  | RPS6KA2      | score: 3.17 |
| OT18_B | OT18_B | CGGGCCCGATG<br>CGCATCCCCGGG     | exon          | chr11:64645666-<br>64645688   | EHD1         | score: 3.57 |
| OT19_B | OT19_B | GGGACCCCATCC<br>CCAAGCCCAGG     | intron        | chr3:129308525-<br>129308547  | PLXND1       | score: 3.97 |
| OT20_B | OT20_B | GGGACCCCATGC<br>TCAAGCCCAGG     | intron        | chr9:140864656-<br>140864678  | LOC105376331 | score: 4.37 |
| OT21_B | OT21_B | GGGACCCGCTG<br>CCCTGCCCCGG<br>G | Intergenic    | chr14:10200722<br>0-102007242 | DIO3OS       | score: 4.55 |
| OT22_B | OT22_B | GGGACCCCATGC<br>CCGAGCCCCGG     | promoter      | chr17:2240485-<br>2240507     | TSR1         | score: 5.17 |
| OT23_B | OT23_B | GGGACCTGATGC<br>CCAGGCCAGG      | intron        | chr1:2180639-<br>2180661      | SKI          | score: 5.53 |
| OT24_B | OT24_B | TGGCCCCGATT<br>CCAACCACAGG      | intron        | chr4:7805378-<br>7805400      | AFAP1        | score: 5.87 |
| OT25_B | OT25_B | GGGTCCCGATGC<br>TCAACCACGGG     | intron        | chr4:62330745-<br>62330767    | ADGRL3       | score: 6.27 |
| OT26_B | OT26_B | AGGTCCCCATGC<br>CCAACCACGG      | intron        | chr1:37493536-<br>37493558    | GRIK3        | score: 6.44 |
| OT27_B | OT27_B | GGGACCCAATGC<br>CCAGCACCTGG     | Intergenic    | chrX:150516968<br>-150516990  | VMA21        | score: 6.57 |
| OT28_B | OT28_B | GGGACCCCATGC<br>ACAACCCAAGG     | intron        | chr6:144284337-<br>144284359  | PLAGL1       | score: 7.37 |
| OT29_B | OT29_B | TGGACCCCATGC<br>CCAGCCTCAGG     | non<br>coding | chr20:411775-<br>411797       | RBCK1        | score: 7.57 |
| OT30_B | OT30_B | CGGACCCGAAGC<br>CCAAGCCTAGG     | intron        | chr3:47866410-<br>47866432    | DHX30        | score: 9.5  |
| OT31_B | OT31_B | GGGACCCGATGC<br>CCAAGCCTGG      | Intergenic    | chr2:121115594-<br>121115615  | INHBB        | score: 7.51 |
| OT32_B | OT32_B | AGGACCCAGCC<br>CAACCCCTGG       | intron        | chr2:241677688-<br>241677709  | AQP12A       | score: 1.28 |
| OT33_B | OT33_B | GGGATCCGTGCC<br>CAACCCAGG       | intron        | chr8:22409582-<br>22409603    | SORBS3       | score: 1.05 |
| OT34_B | OT34_B | GGGACCCGATTG<br>CCCACCCCTGG     | Intergenic    | chr7:53287356-<br>53287379    | POM121L12    | score: 3.5  |
| OT35_B | OT35_B | TGGACCCGCATG<br>GCCAACCCAGG     | Intergenic    | chr16:50485999-<br>50486022   | BRD7         | score: 1.85 |
| OT36_B | OT36_B | AGGCCCTGATGC<br>CCAACCCCCAG     | intron        | chr19:45731177-<br>45731199   | EXOC3L2      | score: 0.4  |
| OT37_B | OT37_B | CAGCCCAGATGC<br>CCAACCCCAAG     | exon          | chr12:53800454-<br>53800476   | AMHR2        | score: 0.53 |
| OT38_B | OT38_B | TGAACACCATGC<br>CCAACCCCAAG     | intron        | chr6:403206-<br>403228        | IRF4         | score: 0.63 |
| OT39_B | OT39_B | GGGAATCCATGC<br>CCAACCCCCAG     | intron        | chr22:38668168-<br>38668190   | TMEM184B     | score: 0.67 |
| OT40_B | OT40_B | AGTACCCATTGC<br>CCAACCCCCAG     | intron        | chr16:8622029-<br>8622051     | TMEM114      | score: 0.77 |
| OT41_B | OT41_B | AGGAGCTGTTGC<br>CCAACCCCAAG     | intron        | chr5:149127157-<br>149127179  | MIR378A      | score: 0.77 |
| OT42_B | OT42_B | GGGACAGGAGG<br>CCCAACCCCCAG     | intron        | chrX:149940578<br>-149940600  | MTMR1        | score: 0.94 |
| OT43_B | OT43_B | GGGACCCAACGA<br>CCAACCCCCAG     | Intergenic    | chrX:58316356-<br>58316378    | ZXDA         | score: 1.57 |
| OT44_B | OT44_B | AGGTCCCGGTGC<br>CCTACCCCCAG     | Intergenic    | chr14:10305780<br>4-103057826 | RCOR1        | score: 2.42 |
| OT45_B | OT45_B | AAGACTCGATGC<br>CCAGCCCCAG      | intron        | chr7:94943990-<br>94944012    | PON1         | score: 2.64 |
| OT46_B | OT46_B | GGGGCCGGATG<br>CCCAGCCCCGAG     | 3'UTR         | chr19:2273114-<br>2273136     | OAZ1         | score: 2.7  |
| OT47_B | OT47_B | AGGAACTGATGC<br>CCACCCCAAG      | intron        | chr8:32427315-<br>32427337    | NRG1         | score: 2.72 |

|        |        |                             |            |                                |           |             |
|--------|--------|-----------------------------|------------|--------------------------------|-----------|-------------|
| OT48_B | OT48_B | GGGGCCCGAGG<br>CCCACCCCCTAG | Intergenic | chr7:156833005-<br>156833027   | MNX1      | score: 2.97 |
| OT49_B | OT49_B | GGGACCAGAAGC<br>CCAGCCCCCAG | Intergenic | chr8:115530370-<br>115530392   | CSMD3     | score: 3.03 |
| OT50_B | OT50_B | TGGACCCAATCC<br>CCATCCCCAAG | intron     | chr12:11109736<br>1-111097383  | HVCN1     | score: 3.27 |
| OT51_B | OT51_B | GGGAACAGATGC<br>CCAAACCCCAG | Intergenic | chr17:11123959-<br>11123981    | SHISA6    | score: 3.42 |
| OT52_B | OT52_B | AGGACCAGAAGC<br>CCAACCCCAG  | intron     | chr7:74482748-<br>74482770     | RCC1L     | score: 4.73 |
| OT53_B | OT53_B | TGGACCAGATGC<br>ACAACCACAAG | Intergenic | chr3:162436725-<br>162436747   | LINC01192 | score: 6.33 |
| OT54_B | OT54_B | CGGCCCCGATGC<br>CCAGCTCCGAG | Intergenic | chr11:71350468-<br>71350490    | KRTAP5    | score: 6.47 |
| OT55_B | OT55_B | GGGACCCAATGC<br>CCCACCACCAG | Intergenic | chr7:2541942-<br>2541964       | LFNG      | score: 7.17 |
| OT56_B | OT56_B | GGGACCCGATGC<br>CCCTGCCCAAG | unknown    | chrUn_gl000228:<br>20563-20582 | unknown   | score: 7.2  |
| OT57_B | OT57_B | GGGACCCGAAG<br>CCCAAGACCCAG | Intergenic | chr11:68876144-<br>68876166    | MIR3164   | score: 7.5  |
| OT58_B | OT58_B | CGGACCCGGTG<br>CCCACCCTCAAG | Intergenic | chr16:88463639-<br>88463661    | ZNF469    | score: 7.65 |

**Table S4. IPEX patient clinical data and *FOXP3* mutations.** Patients (ID\*) 37, 64, 65, 77, and 78 were enrolled at the Stanford Center for Genetic Immune Diseases (CGID). Frequency of demethylated TSDR Tregs (\*\*) in peripheral blood (out of CD3+ T cells) determined by bisulfite qPCR. Healthy donor range is 4.8±1.7% for males (mean ± standard deviation). IPEX patients often have above average frequency of mutated Tregs by testing of TSDR demethylation thought to be attributed to a compensatory mechanism.

| Patient ID* | Mutation             | Molecular outcome                                                                                                        | Age                                        | Clinical manifestations                                                                                                                           | Tregs (%)** | Treatment                                                                                                                                                                               | Outcome                                                                                                                                                                           | Notes                                                                                                          |
|-------------|----------------------|--------------------------------------------------------------------------------------------------------------------------|--------------------------------------------|---------------------------------------------------------------------------------------------------------------------------------------------------|-------------|-----------------------------------------------------------------------------------------------------------------------------------------------------------------------------------------|-----------------------------------------------------------------------------------------------------------------------------------------------------------------------------------|----------------------------------------------------------------------------------------------------------------|
| 24          | c.210+1 G>C          | Exon 1 aberrant skipping, mRNA without start codon, reduced protein translation                                          | At onset: 6yr; At blood draw: 12-13 yrs.   | Gastritis, inflammatory gastropathy with ulcers, failure to thrive                                                                                | 9.2         | Rapamycin for 3 years, followed by HLA-matched unrelated donor hematopoietic stem cell transplantation (MUD-HSCT, at age 14yr); steroids temporarily administered to treat oral aphthae | Rapamycin allowed clinical remission with latent inflammation of gastric mucosa histologically evident; HSCT allowed clinical remission while histology is still under evaluation | Published in Barzaghi <i>et al.</i> , <i>JACI</i> 2018 (4) and Passerini <i>et al.</i> , <i>JACI</i> 2019 (27) |
| 37          | c.1150G >A           | Ala>Thr amino acid change in the forkhead domain, which might affect DNA binding; mutant FOXP3 protein expressed         | At onset: 2 months; At blood draw: 26 yrs. | Chronic autoimmune enteritis, T1D, eczema, alopecia                                                                                               | 12.8        | Steroids, Tacrolimus, Azathioprine, Rapamycin, Humira                                                                                                                                   | Partial disease control                                                                                                                                                           | Published in Barzaghi <i>et al.</i> , <i>JACI</i> 2018 (4)                                                     |
| 64          | c.1270_1 272delin sC | Frameshift mutation predicted to cause new C-terminal and misfolded protein degradation; absent FOXP3 protein expression | At onset: 2 wks; At blood draw: 4-12 mo    | Autoimmune enteritis, dehydration, malabsorption, hyper IgE, eczema                                                                               | 13.1        | Rapamycin, steroids; at 5mo he received an alpha,beta-cell depleted paternal haploidentical stem cell transplant.                                                                       | Mixed donor chimerism in disease clinical remission (and low dose Rapamycin)                                                                                                      | Younger brother of patient 65                                                                                  |
| 65          | c.1270_1 272delin sC | Frameshift mutation predicted to cause new C-terminal and misfolded protein degradation; absent FOXP3 protein expression | At onset: 1 mo; At blood draw: 12-16 mo    | Chronic severe autoimmune enteritis, bowel obstruction, rectal bleeding, abdominal pain, malabsorption, weight loss, autoimmune hepatitis, eczema | 31.6        | Steroid, Tacrolimus, Ciclosporin, Campath, Rapamycin, followed by alpha,beta-cell depleted paternal haploidentical stem cell transplant at 18 months.                                   | Full donor chimerism and normal immune reconstitution.                                                                                                                            | Older brother of patient 64                                                                                    |

|    |           |                                                                                                                  |                                              |                                                    |     |                                                        |                                            |                                                                                                 |
|----|-----------|------------------------------------------------------------------------------------------------------------------|----------------------------------------------|----------------------------------------------------|-----|--------------------------------------------------------|--------------------------------------------|-------------------------------------------------------------------------------------------------|
| 77 | c.1129C>G | His>Asp amino acid change in the forkhead domain, which might affect DNA binding; mutant FOXP3 protein expressed | At onset: 13 yrs.; At blood draw: 14-15 yrs. | Inflammatory colitis, T1D, moderate eczema         | 4.5 | Systemic or local steroids as needed                   | Recurrent moderate clinical manifestations | Older brother of patient 78 with milder clinical presentation                                   |
| 78 | c.1129C>G | His>Asp amino acid change in the forkhead domain, which might affect DNA binding; mutant FOXP3 protein expressed | At onset: infancy; At blood draw: 7 yrs.     | Gastritis, colitis, arthralgias, failure to thrive | 7.0 | Steroids, Sulfasalazine, Azathioprin during recurrence | Recurrent moderate clinical manifestations | Also has two variants in <i>LRBA</i> gene [c.3905C>T(p.Thr1302Ile) and c.7675G>T(p.Ala2559Ser)] |
